# Supplementary material
Source: PubMed Central journal article supplement (PMC2739447)
Supplement: NIHMS140638-supplement-Suppl_Fig_1.pdf [file NIHMS140638-supplement-Suppl_Fig_1.pdf]

# Supplemental figure 1

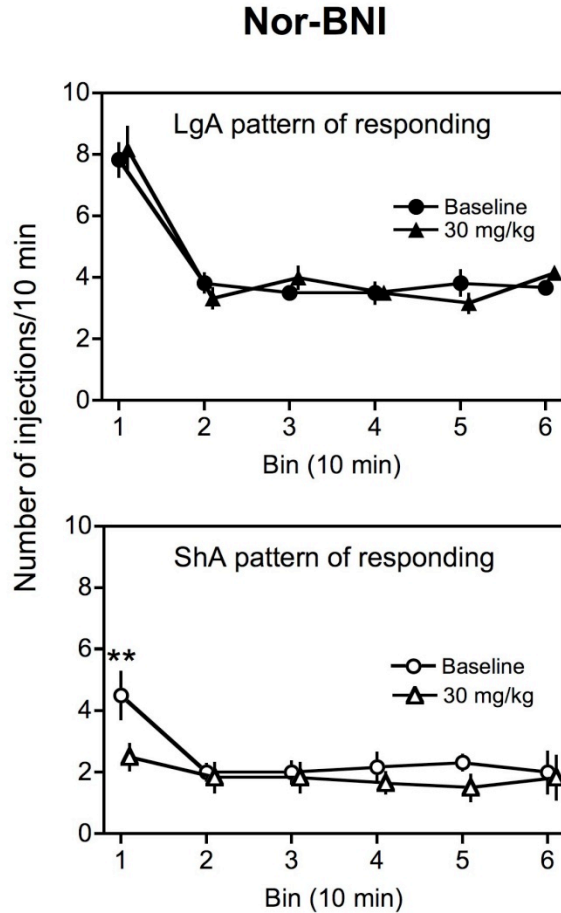

**Comparison of pattern of responding during the first hour of a session between the baseline and 30 mg/kg of nor-BNI treatment conditions.**

Data are cocaine self-administration on Day 1 and expressed as the number of injections per bin (10 minutes). Error bars are SEM values. Rats were injected with 30 mg/kg of nor-BNI 30 minutes before a session and were allowed to self-administer 0.5 mg/kg/injection of cocaine under a fixed-ratio (FR) schedule. Two FR sessions that preceded nor-BNI treatment served as baseline. Circles represent the baseline data, and triangles represent the data after 30 mg/kg of nor-BNI injection. Data were analyzed with two-way repeated measures ANOVA (Bin  $\times$  Treatment), and, in both groups, there were significant simple effects of Bin and Treatment. \*\* $p < 0.01$  compared with the vehicle in the same bin.
