# Supplementary material
Source: PubMed Central journal article supplement (PMC2739447)
Supplement: NIHMS140638-supplement-Suppl_Fig_2.pdf [file NIHMS140638-supplement-Suppl_Fig_2.pdf]

## Supplemental figure 2

### SG-II-49

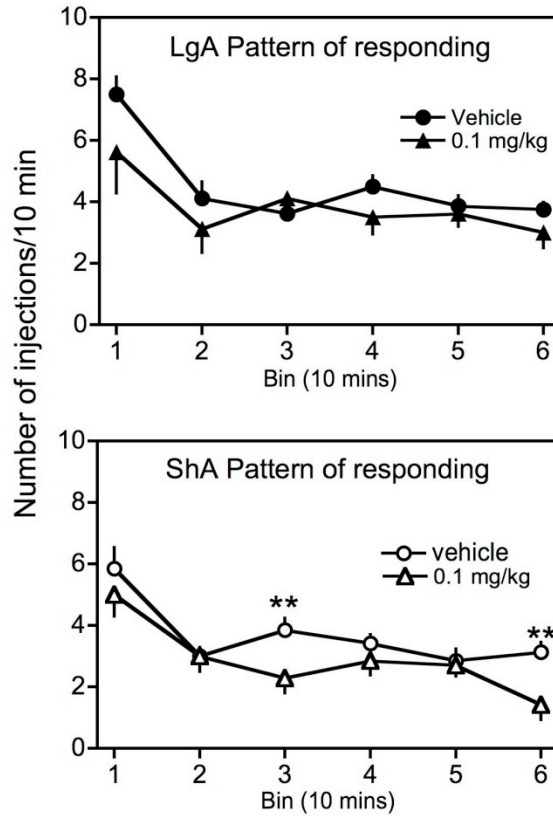

**Comparison of pattern of responding during the first hour of sessions between the vehicle and SG-II-16 test sessions.**

Responding was maintained under a fixed-ratio schedule. Data are expressed as the number of injections per bin (10 minutes). Error bars are SEM values. Circles represent the vehicle data, and triangles represent the data after 0.1 mg/kg of SG-II-49 injection. Data were analyzed with two-way repeated measures ANOVA (Bin  $\times$  Treatment), and, in both groups, there were significant simple effects of Bin and Treatment. \*\* $p < 0.01$  compared with the vehicle in the same bin.
